# Supplementary material for: Analysis of 13 Banned Colorants in Cosmetics via Liquid Chromatographic and Mass Spectrometric Techniques
Source: MDPI journal article supplement (doi:10.3390/app13105967), 2023-05-12
Supplement: s1 [file s1]

## Supplementary Materials

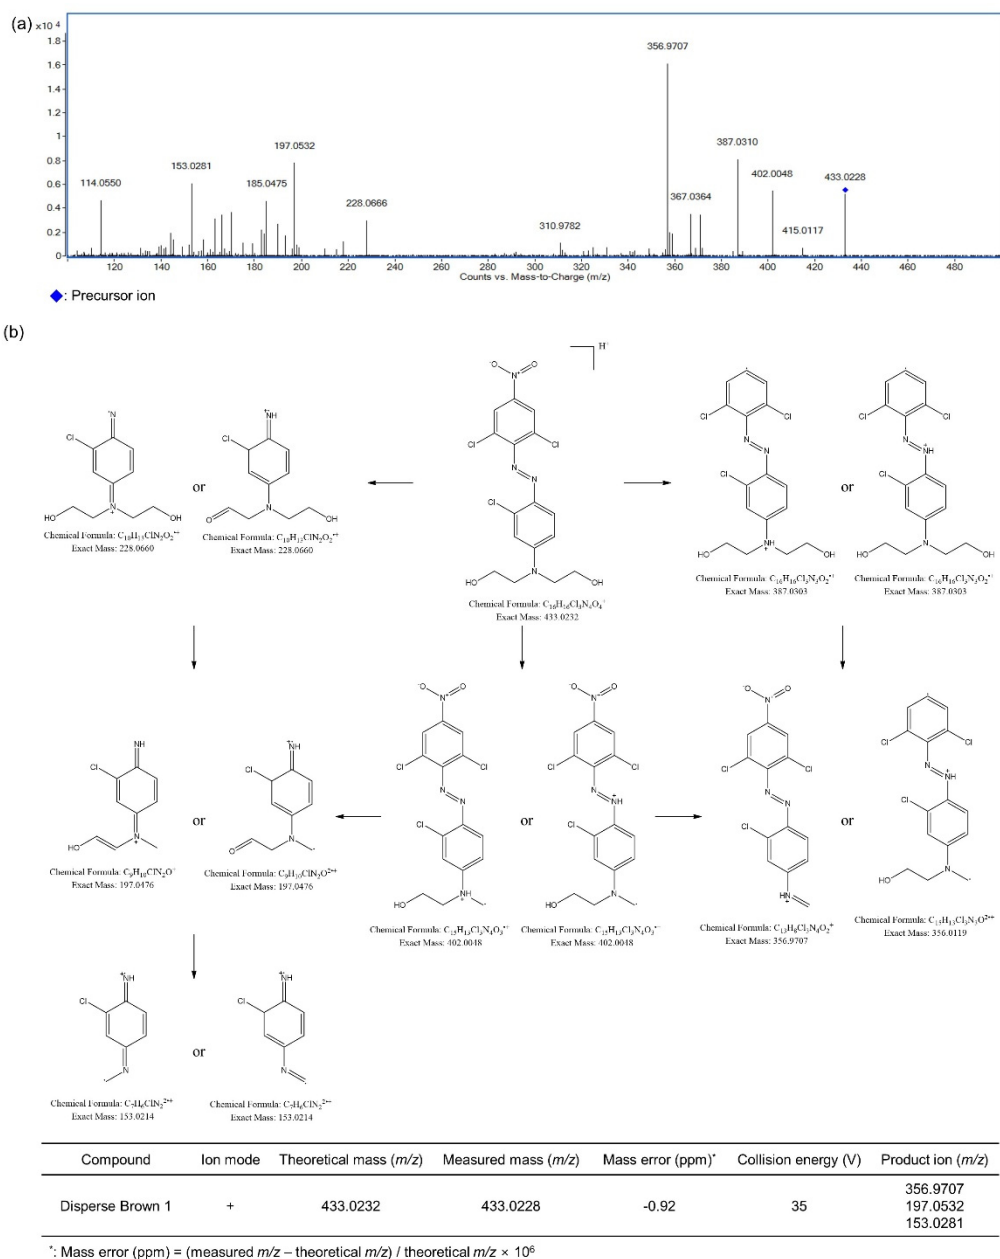

**Figure S1.** Optimized MS/MS spectrum (a) and proposed fragmentation pattern of Disperse Brown 1 (b) by LC-Q-TOF-MS

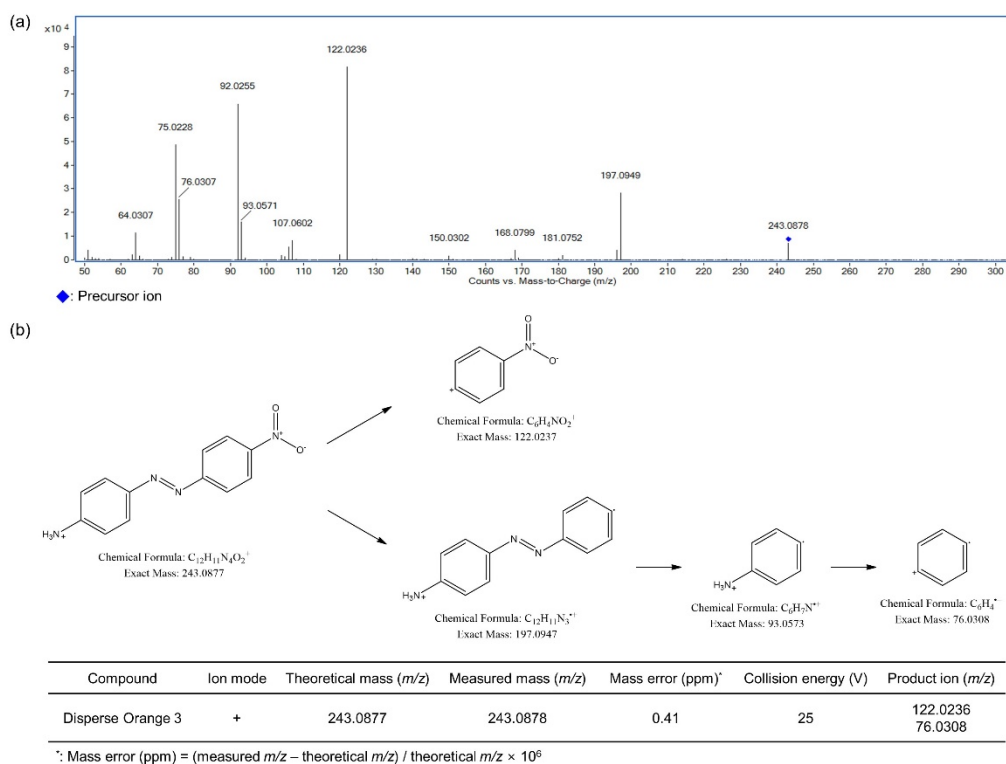

**Figure S2.** Optimized MS/MS spectrum (a) and proposed fragmentation pattern of Disperse Orange 3 (b) by LC-Q-TOF-MS

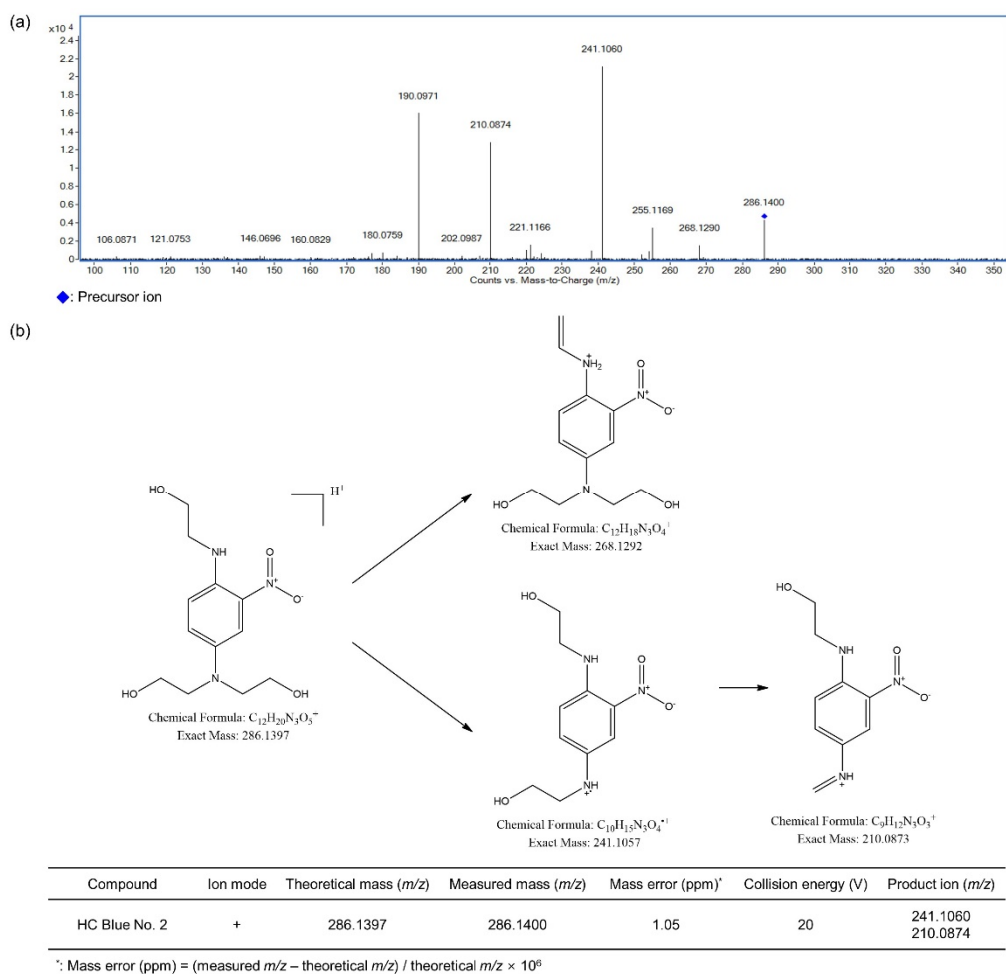

**Figure S3.** Optimized MS/MS spectrum (a) and proposed fragmentation pattern of HC Blue No. 2 (b) by LC-Q-TOF-MS

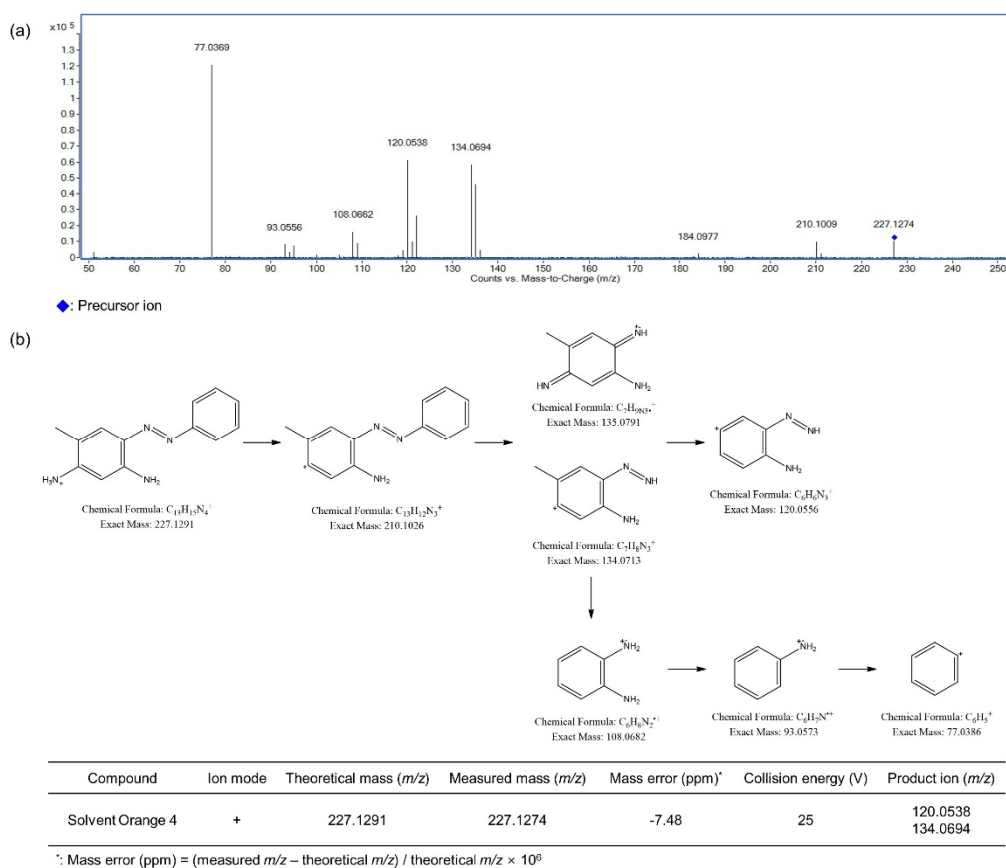

**Figure S4.** Optimized MS/MS spectrum (a) and proposed fragmentation pattern of Solvent Orange 4 (b) by LC-Q-TOF-MS

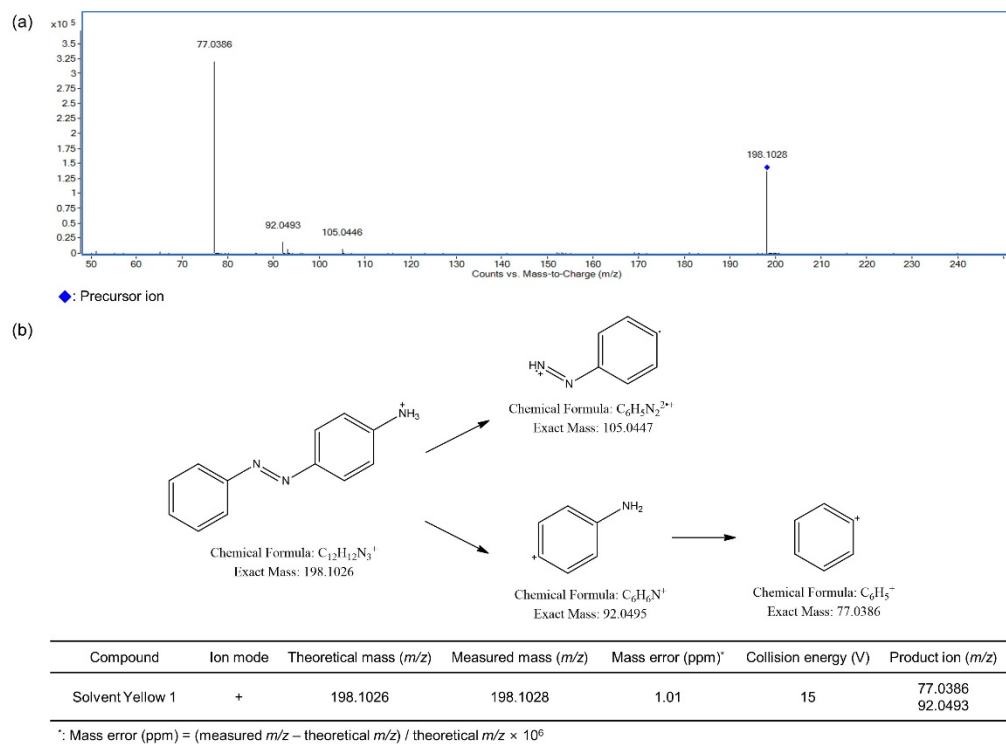

**Figure S5.** Optimized MS/MS spectrum (a) and proposed fragmentation pattern of Solvent Yellow 1 (b) by LC-Q-TOF-MS

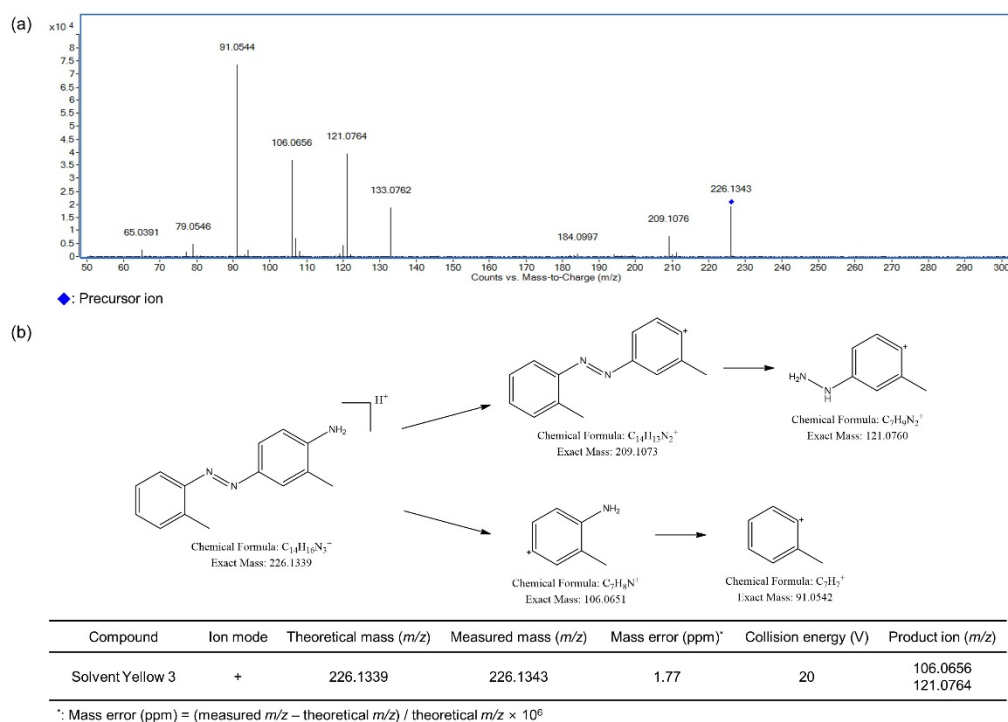

**Figure S6.** Optimized MS/MS spectrum (a) and proposed fragmentation pattern of Solvent Yellow 3 (b) by LC-Q-TOF-MS

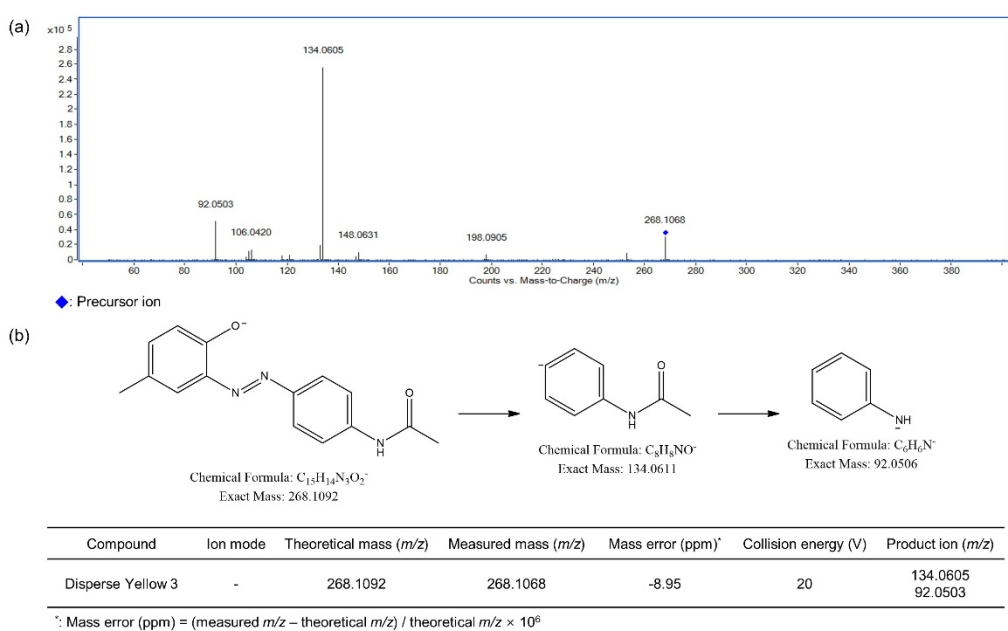

**Figure S7.** Optimized MS/MS spectrum (a) and proposed fragmentation pattern of Disperse Yellow 3 (b) by LC-Q-TOF-MS

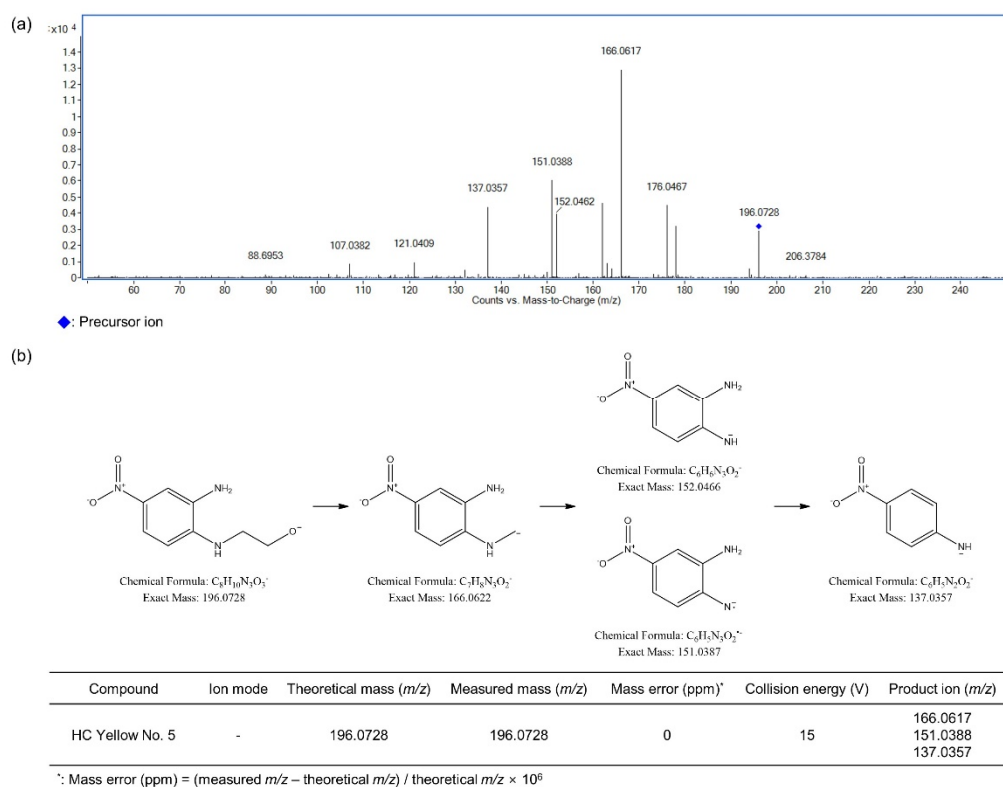

**Figure S8.** Optimized MS/MS spectrum (a) and proposed fragmentation pattern of HC Yellow No. 5 (b) by LC-Q-TOF-MS

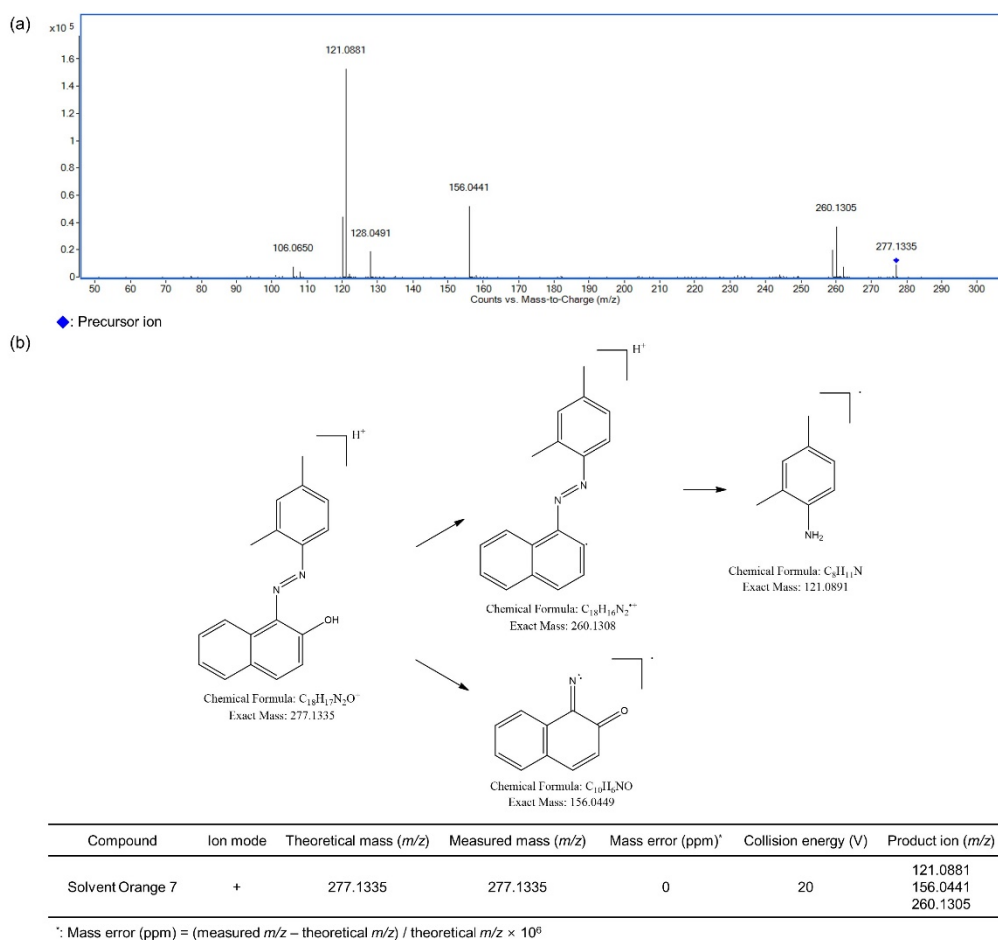

**Figure S9.** Optimized MS/MS spectrum (a) and proposed fragmentation pattern of Solvent Orange 7 (b) by LC-Q-TOF-MS

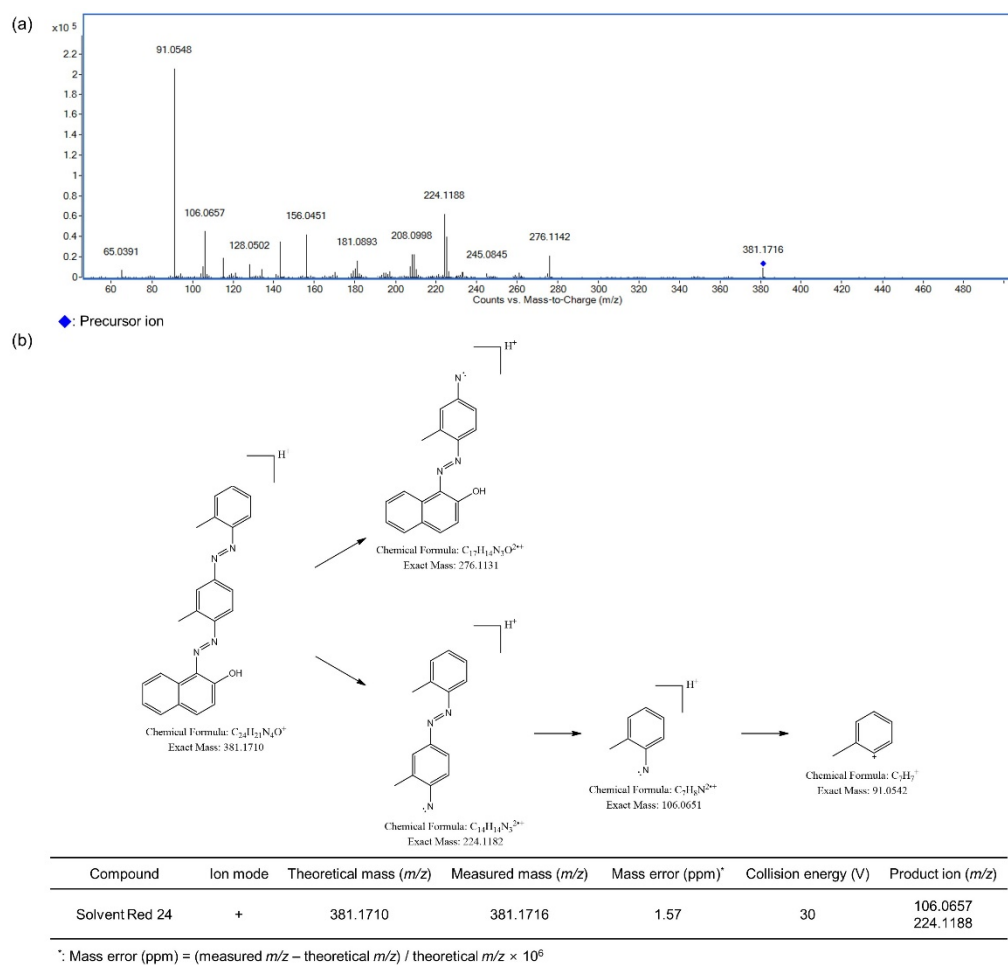

**Figure S10.** Optimized MS/MS spectrum (a) and proposed fragmentation pattern of Solvent Red 24 (b) by LC-Q-TOF-MS
